# Supplementary material for: The significance of incorporating spatial disparities in scale development for assessing latent constructs in the field of bioenergy
Source: Research Square preprint supplement (doi:10.21203/rs.3.rs-3360144/v1), 2023-10-11
Supplement: Supplementary file 1 [file 44491569723dca74ade6f8a0.xlsx]

## Sheet: Feuil1
Table A.2: Dataset displaying the initial pool of 63 items used in the study
AT1	AT2	AT3	AT4	AT5	AT6	AT7	AT8	AT9	AT10	AT11	AT12	AT13	AT14	IS1	IS2	IS3	IS4	IS5	IS6	IS7	IS8	KR1	KR2	KR3	KR4	KR5	KR6	KR7	KR8	KR9	KR10	KR11	KR12	KR13	KR14	CE1	CE2	CE3	CE4	CE5	CE6	CE7	CE8	CE9	CE10	CE11	CE12	CE13	CE14
4	4	4	4	3	4	4	4	4	4	5	4	2	2	2	4	4	4	3	4	4	4	4	3	3	3	4	5	4	3	3	4	3	4	4	4	4	4	4	4	4	4	3	5	4	4	4	4	4	4
5	5	5	4	4	4	4	4	4	4	5	4	4	4	4	4	4	4	4	4	4	5	4	4	4	4	4	5	4	4	3	4	4	3	4	4	4	4	4	4	5	5	4	5	5	5	5	5	4	4
4	4	4	4	4	4	4	4	4	4	5	4	3	3	2	4	4	4	4	4	5	5	2	3	3	3	3	5	3	3	3	4	3	4	4	4	4	4	4	4	5	5	4	5	5	5	5	5	4	4
4	4	4	4	4	4	4	4	4	4	5	4	3	3	2	4	4	4	4	4	4	5	4	3	3	3	3	5	3	4	3	4	4	4	4	4	4	4	3	4	5	5	3	5	5	4	4	4	4	4
4	4	4	4	4	4	4	4	4	4	5	5	3	3	4	4	5	4	4	4	4	4	2	3	3	3	3	5	3	3	3	4	2	4	4	4	2	4	3	4	5	5	3	5	4	4	4	4	4	4
4	4	4	4	4	4	4	4	4	4	5	4	2	2	2	4	4	4	4	4	4	4	4	4	3	3	3	5	3	4	3	4	4	4	4	4	4	4	3	4	5	5	4	5	4	5	5	5	3	3
4	4	4	4	3	3	4	2	2	3	3	3	1	1	1	4	4	4	2	2	2	4	3	3	3	3	3	5	3	3	3	4	2	4	3	3	1	3	3	4	4	4	3	5	5	5	5	5	4	3
4	4	2	2	2	2	4	4	4	4	5	3	2	2	1	4	4	4	2	2	2	4	2	3	3	4	3	5	3	3	3	4	3	4	4	4	2	2	3	4	4	5	3	5	5	4	4	4	3	4
2	4	4	2	4	2	4	4	3	4	5	4	2	2	1	4	4	4	3	3	3	4	2	3	3	3	3	5	3	3	3	4	3	3	3	4	4	4	4	4	4	4	3	4	4	4	4	4	4	4
2	4	4	4	4	4	4	4	4	4	5	3	2	2	2	2	2	2	3	3	2	3	3	3	3	3	3	5	3	3	3	3	3	4	4	4	2	4	3	4	4	4	4	5	5	5	5	5	4	4
4	4	4	4	4	4	4	4	4	4	4	4	2	2	2	4	4	4	4	4	4	5	3	3	3	3	3	4	3	3	3	4	3	4	4	4	3	4	4	4	4	4	3	5	4	5	5	5	4	3
4	4	4	4	4	4	4	4	4	4	5	4	4	4	2	5	5	5	4	4	4	5	4	4	3	3	3	5	4	4	3	4	4	4	4	4	4	4	3	4	4	4	3	5	5	5	5	5	4	4
4	4	4	4	4	4	4	4	4	4	5	4	3	3	2	4	4	4	4	4	4	4	4	4	4	4	4	5	3	4	3	4	4	4	4	4	4	4	4	4	5	5	4	5	5	5	5	5	4	4
4	4	4	4	4	4	4	4	4	4	4	4	4	3	2	4	4	4	4	4	4	4	2	3	3	3	3	5	1	1	1	4	2	4	3	4	3	3	4	4	5	5	4	5	5	5	5	5	4	4
5	4	4	4	3	4	4	4	5	4	5	4	2	2	2	4	4	4	4	5	5	5	2	3	3	3	2	5	1	1	1	4	1	4	4	4	3	3	4	4	5	5	4	5	5	4	4	4	4	4
5	5	4	4	4	5	4	4	5	5	5	4	4	4	1	5	5	5	4	4	4	5	1	3	3	3	3	5	1	1	1	2	1	3	3	4	4	3	3	5	4	5	5	5	5	5	5	5	4	4
5	5	4	5	4	4	4	4	5	5	5	5	4	4	1	4	4	4	5	5	5	5	2	3	3	3	3	5	1	1	1	4	1	4	4	4	2	4	4	4	5	5	5	5	4	5	5	5	4	4
5	4	4	5	4	4	4	4	5	4	5	4	4	4	2	4	4	4	5	5	5	5	1	3	3	3	2	5	1	1	1	2	2	3	3	4	4	4	4	5	5	5	5	5	5	4	4	4	5	5
5	5	4	4	3	5	4	4	5	4	5	4	4	4	2	4	4	4	4	4	4	4	1	3	3	3	1	5	1	1	1	1	1	3	3	4	4	4	4	5	4	4	4	5	5	5	5	5	4	4
5	5	3	5	4	4	4	4	4	4	4	4	4	4	1	4	4	5	4	4	4	5	2	3	3	3	3	5	1	1	1	2	2	3	4	4	2	4	4	5	5	5	4	5	4	4	4	4	5	5
5	5	3	4	3	4	5	5	5	5	5	5	4	4	1	5	5	4	4	4	5	5	2	3	3	3	3	5	1	2	1	4	2	3	3	4	4	4	4	5	5	5	5	5	5	5	5	4	5	5
5	5	4	5	4	4	5	5	5	5	5	4	4	4	1	4	5	5	5	5	5	5	1	3	3	3	2	5	1	1	1	4	2	3	3	4	2	4	4	5	5	5	4	5	5	5	4	4	5	5
4	4	5	4	5	4	4	4	5	4	4	4	3	2	2	4	2	4	4	4	2	4	4	4	5	4	5	4	3	4	3	2	4	4	5	5	4	5	4	4	4	4	4	4	4	4	4	5	5	5
4	4	4	4	4	4	4	4	4	4	4	5	4	4	4	4	4	5	4	4	4	4	4	4	4	4	4	4	3	4	2	2	4	4	4	4	5	4	4	4	4	4	4	4	4	4	4	4	4	4
5	5	4	4	4	5	5	4	4	5	5	5	3	2	2	5	5	5	5	5	4	5	5	5	5	5	5	5	4	4	4	2	4	5	5	5	2	5	5	5	5	5	5	5	5	5	5	5	5	5
5	5	4	4	4	5	5	5	5	5	5	5	3	2	2	5	5	5	2	2	2	5	4	4	5	5	5	4	3	4	3	3	4	5	5	5	5	5	5	4	5	4	5	5	5	5	5	5	5	5
4	4	5	4	4	5	5	5	4	4	4	4	4	4	2	5	5	5	3	4	4	4	4	4	5	5	5	5	4	4	4	4	4	5	5	5	4	5	5	5	5	4	5	5	5	5	5	5	5	4
4	4	4	4	4	5	5	5	4	5	5	5	5	5	1	5	5	5	5	5	5	5	5	5	5	5	5	5	3	4	4	3	5	5	5	5	5	5	5	5	5	5	5	5	5	5	5	5	5	5
4	4	4	4	5	5	5	5	4	4	4	4	2	2	2	5	5	5	2	2	4	4	4	5	5	5	3	4	2	4	4	2	4	5	5	5	5	5	5	5	5	5	5	5	4	5	5	5	5	5
5	5	5	5	5	5	4	5	5	4	5	5	5	5	2	5	5	5	5	5	5	5	5	5	5	5	5	5	5	5	5	5	5	5	5	5	5	5	5	5	4	4	4	4	5	5	5	5	5	5
5	5	5	5	4	5	5	5	5	5	5	5	5	4	4	4	4	5	5	4	4	4	4	5	4	5	5	4	4	4	4	4	4	4	4	4	1	2	5	2	5	5	5	5	5	5	5	5	5	5
5	2	5	2	4	4	5	5	5	4	5	5	5	5	5	5	5	5	5	5	5	5	5	5	5	5	5	5	1	4	2	2	4	4	4	4	4	4	4	4	5	5	4	5	5	3	5	5	5	5
5	5	5	5	5	5	5	5	5	5	5	5	5	5	5	5	5	5	5	5	5	4	4	4	4	4	4	4	4	4	4	4	4	4	4	4	4	4	4	4	4	4	4	4	4	4	4	4	4	4
5	5	5	5	5	5	4	5	5	5	4	4	4	4	4	4	4	4	4	4	4	4	4	4	4	4	4	4	3	4	4	3	4	4	4	4	4	4	4	4	4	4	4	4	4	4	4	4	4	4
4	4	4	5	5	4	5	4	5	4	4	4	3	3	2	4	5	5	5	5	4	4	4	5	4	5	4	4	3	4	4	4	4	4	5	4	4	3	4	4	4	4	4	4	4	4	5	5	5	5
4	5	4	4	5	5	4	4	4	4	4	4	5	4	4	4	4	5	5	5	4	4	4	4	4	4	4	4	3	4	2	4	4	4	5	4	5	4	4	4	4	4	5	5	5	5	5	4	4	4
4	5	4	4	5	4	4	5	4	4	5	4	5	4	4	5	4	3	4	4	4	4	4	4	5	5	4	5	3	5	4	4	4	4	4	4	4	5	4	5	5	4	4	4	4	4	4	5	5	4
4	5	5	5	5	5	5	5	5	5	5	5	2	2	1	2	2	2	2	2	2	2	4	4	4	4	4	5	4	4	4	4	5	4	4	4	5	4	4	4	5	5	4	4	4	4	4	4	4	4
4	5	4	4	4	4	5	4	5	4	4	4	2	2	2	2	4	4	4	5	4	4	4	4	4	4	4	4	4	4	4	4	4	4	4	5	4	4	4	4	5	4	4	5	4	4	4	4	5	4
4	4	5	4	4	4	5	4	5	4	4	4	4	4	4	4	4	4	4	4	5	4	4	4	4	4	5	5	4	4	4	4	4	4	4	5	4	4	4	4	4	4	4	5	4	4	4	4	4	4
4	4	4	4	5	4	4	4	5	4	4	4	5	4	4	4	4	5	4	4	4	4	4	4	4	5	5	4	3	4	3	4	4	4	5	4	4	4	4	4	4	4	4	4	4	5	4	4	4	5
4	4	4	4	4	5	4	4	4	4	4	4	2	2	2	1	4	4	4	4	4	4	4	4	5	5	5	4	3	4	3	3	4	5	5	4	4	4	4	4	4	5	4	4	5	4	4	4	4	4
4	4	4	4	4	4	5	5	4	4	4	4	4	4	4	4	4	4	4	4	4	5	5	4	4	4	4	5	5	3	3	4	3	4	4	4	2	4	4	4	4	4	4	5	5	4	4	4	4	4
4	4	4	4	4	4	4	4	4	4	5	4	2	2	2	4	3	3	2	2	2	2	2	4	4	4	4	5	4	4	3	4	4	4	4	4	2	4	4	4	5	5	4	5	4	5	5	5	4	4
4	4	4	4	2	2	4	4	4	4	5	4	2	2	2	4	4	4	2	2	2	2	2	4	4	4	4	5	4	4	3	4	4	4	4	4	2	4	4	4	5	5	4	5	4	5	5	5	5	5
4	4	4	4	4	4	4	4	4	4	5	4	4	4	4	4	4	4	5	5	5	5	2	3	3	3	3	5	3	3	3	4	2	4	3	4	4	4	4	4	5	5	4	5	4	5	5	5	4	4
4	4	4	4	4	4	4	4	4	4	5	4	4	4	2	5	5	5	4	4	4	5	4	4	3	4	4	5	4	4	1	5	4	5	5	5	4	4	4	4	5	5	4	5	4	5	5	5	5	5
5	5	5	4	4	4	4	4	4	4	5	4	4	4	4	4	5	5	5	5	5	5	4	4	3	4	4	5	3	4	3	4	4	4	4	4	4	4	4	4	5	5	4	5	5	5	5	5	4	4
5	5	5	4	4	4	4	4	4	4	5	4	4	4	1	5	4	4	4	4	4	4	4	4	3	4	3	5	4	4	3	4	4	5	5	5	4	4	4	4	4	5	4	5	4	4	4	4	4	4
5	5	5	5	5	5	5	5	5	5	5	5	4	4	4	5	5	5	5	5	5	5	5	5	5	5	5	5	4	5	4	5	5	5	5	5	5	5	5	5	5	5	4	5	5	5	5	5	5	5
4	4	4	4	2	2	4	4	4	4	5	4	2	2	2	4	4	4	2	2	2	2	2	4	3	4	4	5	3	4	3	4	4	4	4	4	2	4	4	4	5	4	3	5	4	5	5	5	4	4
4	5	5	4	4	4	4	4	4	4	5	4	2	2	2	5	5	5	3	3	3	3	2	4	4	4	4	5	4	4	2	5	4	5	5	5	4	4	4	4	5	5	4	5	5	5	5	5	5	5
5	5	5	5	4	4	4	4	4	4	4	4	4	4	2	5	5	5	4	4	4	4	4	4	3	4	4	5	3	4	3	4	4	4	4	4	4	4	4	4	4	5	4	5	4	5	5	5	4	4
5	5	4	4	4	4	5	4	4	4	5	4	3	3	2	5	5	5	4	4	4	4	3	4	3	4	4	5	3	4	1	5	4	5	5	5	4	4	4	4	5	5	4	5	5	5	5	5	5	5
4	4	4	3	4	4	4	4	4	4	4	4	2	2	2	4	4	4	4	4	4	4	2	3	3	3	3	5	3	3	3	4	3	3	3	3	2	3	3	4	4	5	3	5	4	4	4	4	3	3
5	5	5	5	5	5	5	5	5	5	5	5	4	4	4	4	4	4	4	4	4	4	5	5	5	5	5	5	4	5	4	5	5	5	5	5	5	5	5	5	5	5	4	5	5	5	5	5	5	5
5	5	5	4	4	4	4	4	4	4	5	5	3	3	1	4	4	4	2	2	2	3	1	3	3	3	3	5	2	2	2	2	1	3	3	4	4	4	4	5	5	5	4	5	5	4	4	5	4	4
5	5	5	5	4	4	4	4	4	4	5	4	4	4	2	4	4	4	4	4	4	5	2	4	3	3	3	5	2	4	2	4	4	4	4	4	4	4	4	5	5	5	4	5	5	5	5	5	5	5
5	5	4	4	3	3	5	4	5	4	5	4	2	2	2	4	4	4	2	2	2	2	2	4	3	3	3	5	1	4	1	4	4	4	4	4	2	4	4	5	4	4	4	5	4	5	5	5	5	4
4	4	4	4	4	4	4	4	4	4	4	4	1	1	1	4	4	4	4	4	4	4	1	3	3	3	3	4	2	2	2	4	2	3	4	4	4	4	4	5	5	4	4	5	4	5	4	5	4	4
5	5	5	4	4	4	5	5	4	4	5	5	1	1	2	5	5	5	4	4	4	5	4	4	3	3	4	5	1	4	1	4	4	4	5	4	2	4	4	5	5	4	4	5	5	4	5	5	4	5
5	5	4	4	4	4	4	4	5	4	5	4	2	2	1	4	4	4	2	2	2	2	2	3	3	3	3	5	1	4	1	4	4	4	4	4	4	4	4	5	5	5	4	5	5	4	4	5	4	4
5	5	4	4	4	4	4	5	5	5	5	4	2	2	2	4	5	4	4	4	4	4	2	3	3	3	3	5	2	2	2	4	2	3	3	4	4	4	4	5	5	5	4	5	5	5	4	5	5	5
4	4	4	4	4	4	4	4	5	5	5	4	2	2	1	4	4	4	2	2	2	2	1	1	3	3	2	5	1	4	1	4	4	4	4	4	4	4	4	5	5	5	5	5	5	5	5	5	4	4
5	5	5	4	4	4	4	4	4	4	5	4	2	2	2	4	4	4	4	4	4	4	1	3	3	3	3	5	1	2	2	4	2	3	3	4	4	4	4	5	5	5	4	5	5	4	4	5	4	4
4	3	5	4	3	5	5	4	4	3	5	5	1	2	1	5	5	5	4	4	4	5	4	5	5	5	5	5	3	4	4	3	4	5	5	5	1	4	4	3	5	5	5	5	5	5	5	5	5	5
4	4	4	5	5	5	5	5	5	5	5	5	1	1	1	4	4	4	4	1	1	3	4	4	4	4	4	4	4	4	4	4	4	4	4	4	4	4	4	4	5	5	5	5	5	4	5	4	4	5
4	4	3	5	3	5	5	4	4	5	5	5	3	1	2	5	5	5	4	4	3	3	4	5	5	5	5	5	4	5	4	4	5	5	5	5	3	5	5	5	5	5	5	5	5	5	5	5	5	5
5	5	5	4	5	5	5	5	5	5	5	5	2	2	1	5	5	5	5	2	2	5	4	5	5	5	5	5	3	4	4	3	4	5	5	5	4	5	4	4	5	5	5	4	5	5	5	5	5	5
5	5	5	5	4	5	5	4	4	4	5	5	4	3	1	5	5	5	2	2	2	4	4	5	5	5	5	4	2	4	4	4	4	4	5	5	5	5	5	5	5	4	5	5	5	5	5	5	5	5
4	4	5	5	4	5	4	5	5	4	5	5	4	4	4	4	5	4	5	4	4	4	4	5	5	5	5	5	3	4	4	4	4	5	5	5	5	5	5	4	4	3	4	5	5	5	5	5	5	5
4	4	5	4	5	4	5	5	5	5	4	5	5	1	1	5	5	5	1	1	4	4	4	5	4	4	4	5	4	4	4	4	4	5	5	5	5	5	5	5	5	4	4	4	5	5	5	5	4	5
4	5	5	5	5	4	5	5	3	5	5	5	2	2	1	5	5	5	2	2	4	5	4	5	5	5	5	4	3	4	4	2	4	5	5	5	5	5	5	5	5	5	4	5	4	4	5	5	5	5
4	4	5	4	4	5	4	5	5	4	5	5	4	4	2	5	5	5	4	4	4	4	4	5	5	5	5	5	3	4	4	4	4	5	5	5	5	5	5	4	5	4	5	5	5	5	5	5	5	4
5	5	5	5	5	5	5	4	5	5	5	5	3	2	1	5	5	5	2	2	4	4	4	4	5	5	5	5	4	4	4	4	4	5	5	5	5	5	5	5	5	5	5	5	5	5	5	5	5	5
4	4	4	5	5	4	5	5	5	5	5	5	2	2	2	4	5	5	2	2	4	4	4	4	4	4	4	4	4	4	4	4	4	4	4	5	5	5	5	5	5	5	5	5	5	5	5	5	5	5
4	4	4	4	4	4	4	5	5	4	5	5	2	2	2	5	5	5	5	5	5	4	4	4	4	5	5	5	4	4	4	3	4	5	5	5	5	5	5	5	5	5	5	5	5	5	5	5	5	5
4	4	4	4	4	5	5	5	5	5	5	5	2	2	2	5	5	5	1	1	5	5	5	5	5	5	5	5	4	5	5	5	5	5	5	5	5	5	5	5	5	5	5	5	5	5	5	5	5	5
5	5	5	5	5	5	5	5	5	5	5	5	2	2	2	5	5	5	1	1	4	4	4	5	5	5	5	5	4	4	4	4	4	5	5	5	1	5	5	5	5	5	5	5	5	5	5	5	5	5
5	5	5	5	5	5	5	5	5	5	5	5	2	2	1	5	5	5	1	1	4	3	4	5	5	5	5	5	3	5	4	3	5	4	5	5	5	5	5	5	5	5	5	5	5	5	5	5	5	5
5	5	5	4	5	5	5	5	5	5	5	5	1	1	1	5	5	5	1	1	4	4	2	5	5	5	5	5	4	4	4	4	4	5	5	5	5	5	5	5	5	5	5	5	5	5	5	5	5	5
4	4	4	5	5	5	5	5	4	4	5	5	2	2	1	5	5	4	1	4	4	4	4	5	5	5	5	5	4	4	4	5	5	5	5	5	5	5	5	5	5	4	5	5	5	5	5	5	5	5
5	5	5	4	4	4	4	4	4	4	4	4	5	1	1	4	4	4	2	4	2	4	4	4	4	5	5	4	3	4	3	3	4	5	5	4	4	4	4	4	5	5	5	5	5	5	5	5	5	4
4	4	5	4	4	4	5	4	4	4	5	5	2	2	2	4	5	4	2	2	4	4	4	4	5	4	4	4	3	4	3	3	4	5	5	4	4	4	4	4	4	4	4	5	4	4	4	4	4	4
4	4	4	4	4	4	4	4	4	4	4	4	4	4	4	4	1	1	2	2	2	3	3	4	4	4	4	4	3	3	2	3	4	4	4	5	5	5	5	4	5	4	4	5	4	5	4	4	5	5
4	4	5	4	4	5	4	5	4	4	4	4	4	4	4	4	5	4	4	4	5	4	4	4	4	5	4	4	2	4	3	3	4	4	4	4	4	4	4	4	4	4	4	4	4	4	4	4	4	4
4	4	5	4	5	5	5	5	5	5	5	5	2	2	1	4	4	4	4	1	2	4	4	4	4	4	4	5	4	4	4	4	4	4	4	5	4	4	4	4	5	4	4	4	4	4	4	4	4	4
4	4	4	4	4	4	4	4	5	5	5	5	2	2	2	4	4	4	4	4	4	4	4	4	4	4	4	5	3	4	3	4	4	4	5	4	4	5	4	4	4	4	5	5	4	4	4	4	4	5
4	4	4	4	4	4	4	4	4	4	4	4	2	2	2	2	2	1	2	2	2	2	4	4	4	4	4	4	3	4	2	2	4	4	4	4	4	4	4	4	4	4	4	4	4	4	4	4	4	4
4	4	4	2	3	4	4	4	2	4	4	4	2	2	2	4	4	4	4	4	4	4	4	3	3	3	4	5	4	1	1	4	1	4	4	4	4	4	3	5	5	5	5	5	5	5	5	5	4	4
3	3	3	3	3	4	4	4	3	4	4	4	3	2	1	4	4	4	4	4	4	4	5	4	3	3	4	5	5	3	3	4	4	4	4	4	4	4	4	4	5	5	5	5	5	5	5	5	4	4
4	4	4	5	4	4	4	4	4	4	5	5	3	3	2	4	4	4	4	4	4	5	4	3	3	3	4	5	4	3	3	4	3	4	4	4	2	4	4	4	4	5	4	5	5	5	5	5	4	4
5	5	4	4	4	5	5	5	4	5	5	5	4	4	4	5	5	4	4	4	4	5	4	4	4	4	4	5	5	4	4	5	4	4	4	4	4	4	4	5	5	5	5	5	5	5	5	5	4	4
5	5	5	5	4	5	5	5	4	5	5	5	4	4	5	5	5	5	5	5	5	5	4	4	5	4	4	5	5	3	3	4	4	4	4	4	4	4	4	5	5	5	5	5	5	5	5	5	4	4
4	4	4	4	4	4	4	4	4	4	4	4	2	2	2	4	4	4	4	4	4	5	2	3	3	3	3	5	1	1	1	4	1	3	3	4	4	4	4	4	5	5	4	5	4	4	4	5	5	5
5	4	5	5	5	5	5	4	4	4	5	4	5	5	1	5	5	4	5	5	5	5	2	3	3	3	3	4	1	2	1	4	1	4	4	5	4	5	4	5	5	5	4	4	5	5	5	5	5	5
5	4	3	5	3	2	4	4	4	3	4	4	4	4	1	5	5	5	5	5	5	5	2	3	3	3	3	5	1	1	1	4	2	3	4	4	3	4	4	5	5	5	4	5	4	4	4	4	5	5
4	4	4	4	3	5	4	2	4	4	5	4	5	5	1	4	4	4	4	4	4	5	2	3	3	3	3	4	1	1	2	4	2	3	4	4	4	4	4	5	5	5	3	5	5	4	4	5	4	4
4	4	4	4	3	5	5	4	4	4	4	4	2	2	1	4	4	4	4	4	4	5	1	3	3	3	3	4	1	2	1	4	2	4	3	4	2	4	4	5	5	5	3	5	5	4	4	5	5	5
4	4	5	5	5	5	4	5	5	4	5	5	3	2	2	4	4	4	4	4	4	4	4	4	4	4	4	4	4	4	4	4	4	5	4	5	5	4	5	5	5	4	5	5	5	4	4	4	5	4
4	5	4	4	5	5	4	5	5	2	5	3	2	4	2	5	5	5	5	5	4	4	4	5	4	4	4	4	3	3	3	3	4	4	4	4	4	5	4	4	1	2	4	4	4	4	4	5	4	4
4	4	4	4	4	4	4	4	5	4	5	5	5	5	4	4	4	5	5	5	5	5	4	4	4	4	4	4	3	4	4	4	4	4	4	4	4	4	4	4	4	5	4	4	4	4	4	5	5	5
5	5	5	4	4	4	5	5	5	5	5	5	4	4	1	1	5	4	1	1	4	4	3	5	5	5	5	5	3	4	3	3	4	5	5	5	5	5	5	4	5	5	5	5	5	5	5	5	5	5
5	5	5	5	4	5	5	5	5	5	5	5	1	1	1	5	5	5	1	1	4	4	4	5	5	5	5	5	3	4	4	4	5	5	5	5	5	5	5	5	5	5	5	5	5	5	5	5	5	5
5	5	5	5	4	5	5	5	5	5	5	5	2	2	1	2	5	5	1	1	4	4	4	5	5	5	5	5	4	4	4	4	4	5	5	5	5	5	5	5	5	5	5	5	5	5	5	5	5	5
5	1	5	3	4	4	5	4	4	4	4	4	1	1	1	1	5	5	1	1	1	4	4	4	4	4	4	5	1	4	4	1	4	5	5	5	4	3	3	4	5	4	4	4	4	4	5	5	5	5
5	5	5	5	5	5	5	5	5	5	5	5	2	2	2	5	5	5	5	5	5	5	5	5	5	5	5	5	4	4	4	4	4	4	4	5	5	5	5	5	5	5	5	5	5	5	5	5	5	5
4	4	5	5	5	5	5	5	5	5	5	5	1	1	1	1	4	5	1	1	4	4	4	5	5	5	5	4	4	4	4	4	4	5	4	4	4	5	5	5	5	5	5	5	5	5	5	5	5	5
5	4	4	4	4	4	4	4	4	4	4	4	4	5	1	2	5	5	4	4	4	4	4	4	4	4	4	4	3	4	4	3	4	4	4	4	4	5	5	5	5	4	5	5	5	5	5	5	5	5
4	4	4	4	4	4	4	4	4	4	4	4	1	1	1	4	1	4	1	1	3	4	2	4	4	4	4	4	2	4	3	3	4	4	4	4	4	4	4	4	4	4	4	4	4	4	4	4	4	4
4	4	4	4	4	4	4	4	4	4	4	4	2	2	2	2	4	4	4	4	4	4	4	4	4	4	4	4	2	4	4	4	4	4	4	4	4	4	4	4	5	5	5	5	5	5	5	5	5	4
4	4	5	4	4	4	4	4	4	4	4	4	4	4	4	4	4	4	4	4	4	4	4	4	4	4	4	4	2	4	4	4	4	4	4	4	4	4	4	3	4	4	4	4	4	4	4	4	4	4
4	4	4	4	4	4	5	5	5	5	4	5	3	3	2	4	4	4	4	4	4	4	4	4	4	4	3	4	3	4	3	3	4	5	4	4	4	4	4	4	4	5	5	4	4	4	5	4	4	4
4	4	4	4	3	5	4	4	4	4	5	4	2	1	2	2	4	4	1	1	2	4	4	4	4	4	4	4	3	4	3	3	4	4	4	4	4	4	4	4	4	4	4	4	4	4	4	4	4	4
4	4	4	4	4	4	5	4	5	4	5	4	5	4	5	5	4	4	4	4	4	4	4	5	4	4	5	4	4	4	4	4	4	4	4	4	4	4	5	5	4	4	4	4	4	4	4	4	3	3
4	4	4	4	5	4	4	4	4	4	4	4	2	2	2	2	4	4	2	2	2	4	4	4	4	4	4	4	3	4	4	4	4	4	4	4	4	4	4	4	4	4	4	4	4	4	4	4	4	4
4	4	4	5	4	4	4	5	4	4	4	4	4	5	4	4	4	4	4	5	4	3	4	5	4	4	4	4	3	4	3	3	4	4	4	4	4	5	5	4	5	5	5	5	5	4	4	4	4	4
4	4	4	4	4	5	5	4	4	4	4	4	4	2	2	2	4	4	4	4	4	5	5	5	4	4	5	4	4	5	4	4	4	4	5	4	4	4	4	4	4	4	4	4	4	5	4	4	4	4
4	4	4	5	4	4	4	5	4	4	4	4	4	4	4	5	4	4	4	4	3	4	4	4	4	4	4	4	3	4	3	4	4	4	4	4	4	4	4	5	4	4	4	5	4	4	5	4	4	3
5	5	5	5	5	5	5	5	5	5	5	5	4	4	5	5	5	5	5	5	5	5	4	4	3	4	4	5	5	4	4	5	4	5	5	4	3	5	5	4	5	5	5	5	5	5	5	5	4	4
4	5	4	4	3	4	4	4	5	4	5	4	4	4	2	4	4	4	4	4	4	5	4	4	4	4	4	5	4	4	3	5	4	4	4	4	2	4	4	4	4	5	3	5	5	5	5	5	4	4
3	4	4	4	3	4	4	4	4	3	5	4	3	3	2	4	4	2	4	4	4	4	3	3	3	3	3	5	3	3	3	4	3	4	4	4	3	4	3	4	4	4	3	5	5	5	5	5	4	4
4	4	4	4	4	4	4	4	4	4	5	4	4	4	2	4	4	4	4	4	4	4	4	4	4	4	4	5	3	4	3	4	4	4	4	4	2	4	4	4	5	4	3	5	5	5	5	5	4	4
4	4	4	4	4	4	4	4	4	4	5	5	4	4	2	4	4	4	5	5	5	5	4	4	4	4	4	5	4	4	3	4	4	4	4	4	2	4	4	4	5	4	4	5	4	5	5	5	4	4
5	4	4	4	4	4	4	4	4	4	5	4	4	4	4	4	4	4	5	5	4	4	4	4	4	4	4	5	4	5	3	4	5	4	4	4	4	4	4	4	5	5	4	5	4	5	5	5	4	4
5	4	4	4	4	4	4	4	4	4	5	4	4	4	4	4	4	4	4	4	4	4	4	4	3	4	4	5	3	4	3	4	4	4	4	4	2	4	4	4	5	5	4	5	5	5	5	5	4	4
4	4	4	4	4	4	4	4	5	4	5	4	5	5	2	4	4	4	4	4	4	5	4	4	3	4	4	5	4	4	3	4	4	4	4	4	4	4	4	4	5	5	4	5	5	5	5	5	4	4
4	4	4	4	4	4	4	2	4	4	4	4	4	4	2	4	4	4	4	4	4	5	4	4	3	4	3	5	3	4	3	4	4	4	4	4	2	4	4	4	5	5	3	5	5	5	5	5	4	4
4	4	4	4	4	5	5	5	4	5	5	5	3	3	4	5	5	4	4	4	4	5	4	3	3	3	3	5	4	3	3	4	3	4	4	4	2	4	4	4	4	4	3	5	5	4	4	4	3	4
4	4	4	5	4	4	4	4	4	4	5	4	4	4	4	5	4	4	4	4	4	5	4	4	3	4	4	5	4	5	3	5	5	5	5	5	2	4	4	4	5	5	4	5	4	4	5	4	4	4
4	4	4	4	4	4	4	4	4	4	5	4	3	3	2	4	4	4	4	4	4	4	2	4	3	4	4	5	3	4	3	4	4	5	4	4	2	4	4	4	5	4	4	5	4	5	5	5	4	4
5	4	4	4	3	4	4	4	4	5	5	4	4	4	2	4	4	4	4	4	4	4	4	4	3	4	3	5	3	4	3	4	4	4	4	4	2	4	4	4	5	5	3	5	5	5	5	5	4	4
4	4	4	4	4	4	4	4	4	4	4	4	4	4	2	4	5	5	5	5	4	5	4	4	3	4	4	5	4	4	3	4	4	4	4	4	4	2	4	4	5	5	4	5	4	5	5	5	4	4
4	4	4	4	2	2	4	4	4	3	4	4	2	2	2	4	4	4	4	4	4	4	2	3	3	3	3	5	3	3	3	4	2	4	4	4	1	4	4	4	4	5	4	5	5	5	5	5	4	4
3	4	4	4	3	4	4	4	4	3	5	3	4	4	4	4	4	4	4	4	4	4	2	4	3	3	3	5	3	4	3	4	3	5	4	4	2	4	4	4	4	4	3	5	4	5	5	5	4	4
4	4	4	4	4	4	4	4	4	4	5	4	4	4	4	4	4	4	4	4	4	4	4	4	3	4	4	5	4	4	3	4	4	5	5	5	4	4	4	4	5	5	4	5	4	5	5	5	4	4
4	4	4	4	4	4	4	4	4	4	5	4	3	3	4	5	4	4	4	4	5	5	2	3	3	4	4	5	4	3	3	4	3	4	4	4	2	4	4	4	4	4	3	5	5	5	5	5	3	3
4	4	4	4	3	4	4	4	4	3	5	4	3	3	2	4	4	4	4	4	4	4	3	3	3	4	3	5	3	3	3	4	3	4	4	4	2	4	4	4	5	5	3	5	5	5	5	5	4	4
5	5	4	4	4	4	4	4	5	5	5	4	5	5	2	4	5	5	5	5	5	5	2	3	3	3	3	5	2	2	1	4	2	3	3	4	4	4	4	4	4	5	5	5	4	5	4	5	5	5
5	5	5	5	5	5	4	3	4	4	5	4	4	4	2	5	5	4	5	5	5	5	2	3	3	3	3	5	3	4	1	4	4	3	4	4	4	4	4	5	5	5	4	5	5	4	4	5	5	5
4	4	3	4	4	4	5	5	4	4	5	4	4	4	1	5	5	5	5	5	5	5	2	3	3	3	3	5	2	2	2	4	2	3	3	4	2	4	4	4	5	5	5	5	5	5	5	5	4	4
5	5	5	5	5	5	4	4	4	5	5	5	5	4	2	4	5	5	5	5	5	5	2	3	3	3	3	3	1	1	3	3	3	4	4	4	4	4	4	5	5	4	5	5	5	5	5	5	4	4
5	5	4	4	3	4	5	5	5	5	5	4	4	4	2	5	5	5	5	5	5	5	2	3	3	3	3	5	1	1	1	4	2	3	3	4	3	4	4	4	4	5	4	5	5	5	5	5	4	4
4	5	5	5	4	4	4	4	5	5	4	4	5	5	3	4	5	5	4	4	4	5	2	3	2	2	2	5	2	2	2	2	3	4	4	4	4	4	4	4	5	5	5	5	5	5	5	5	4	4
4	4	5	5	5	4	4	5	5	5	4	4	4	4	1	4	5	5	5	5	5	5	2	3	3	3	3	5	1	1	2	2	2	3	3	4	4	4	4	4	4	5	5	5	5	5	5	5	4	4
5	5	4	5	4	4	5	5	5	5	5	5	4	4	1	4	4	4	5	5	5	5	2	3	3	3	3	5	2	2	2	4	2	4	4	4	5	5	5	5	5	5	4	5	5	4	4	5	5	5
4	4	4	4	4	4	4	4	4	4	5	4	5	5	2	5	4	4	4	5	5	5	2	4	3	4	3	5	2	4	2	4	4	4	4	5	4	4	4	4	5	4	4	5	4	4	4	4	4	4
5	4	4	4	4	4	4	2	4	4	4	4	5	5	1	4	5	5	5	5	5	5	2	3	3	3	3	5	2	2	2	2	2	3	3	4	2	4	4	5	4	4	3	5	5	5	5	5	5	5
4	3	3	4	3	4	4	2	4	4	4	4	5	5	2	5	5	4	5	5	5	5	1	3	3	3	3	5	1	1	1	4	2	3	3	4	2	4	4	4	5	4	5	4	5	5	5	5	5	5
4	4	4	4	4	4	5	5	5	5	4	4	5	5	1	5	5	4	5	5	5	5	2	3	3	3	3	5	1	4	2	4	4	4	4	4	2	4	4	4	5	5	4	4	5	5	5	5	5	5
4	4	4	4	4	4	4	4	4	4	5	5	5	5	1	5	5	5	5	5	5	5	1	3	3	4	3	5	2	4	1	4	2	4	4	4	4	4	4	4	5	5	5	5	5	5	5	5	4	4
4	4	4	4	3	4	4	4	5	4	4	4	5	5	2	5	5	5	5	5	5	5	2	3	3	4	3	5	1	2	1	4	2	4	4	4	4	4	4	5	5	5	4	5	4	4	5	5	5	5
4	4	4	4	3	4	4	4	5	4	4	4	4	4	2	5	5	5	5	5	5	5	1	3	3	3	1	5	1	1	1	4	2	3	3	4	4	4	4	5	5	5	4	5	5	5	5	5	5	5
4	4	4	4	3	4	4	4	5	5	4	4	4	4	1	5	5	5	5	5	5	5	2	3	3	3	3	5	2	2	2	4	2	3	3	4	4	4	4	5	5	5	4	5	5	4	4	5	5	5
5	5	4	4	4	4	5	4	5	4	5	4	5	5	2	5	4	4	4	4	5	5	2	3	3	3	3	5	2	2	2	4	1	4	4	4	4	4	4	4	5	5	4	4	5	5	5	5	5	5
4	4	4	5	3	4	5	4	4	4	4	5	4	4	1	5	5	5	5	5	5	5	1	3	3	3	3	4	1	1	1	4	2	4	4	4	5	5	5	5	5	5	4	5	5	5	5	5	5	5
5	5	4	4	3	5	5	4	5	4	4	4	5	5	1	5	5	5	5	5	5	5	1	3	3	3	2	5	1	2	2	4	2	4	3	4	5	5	5	5	5	5	4	4	5	5	5	5	4	4
4	4	4	4	3	5	5	4	4	4	5	4	4	4	1	4	4	4	5	5	5	5	2	3	3	3	3	5	2	2	1	4	2	4	4	4	5	4	3	5	4	4	3	5	5	5	4	5	4	4
5	4	4	5	5	5	5	5	5	5	4	4	4	4	2	5	5	5	5	5	4	4	1	3	3	3	3	5	2	2	2	4	2	3	4	4	4	4	4	5	5	5	3	5	5	4	4	5	5	5
5	5	4	4	3	4	4	4	5	5	4	5	5	5	1	5	5	5	5	5	5	5	2	3	3	3	2	5	1	1	1	4	2	4	4	4	5	5	4	5	5	5	3	5	5	5	5	5	4	4
4	4	4	4	3	5	5	4	5	4	4	4	5	5	1	5	5	5	5	5	5	5	1	3	3	3	3	5	1	1	1	4	1	3	4	4	2	4	4	5	5	5	4	5	5	4	4	5	5	5
5	5	4	4	5	5	5	4	5	4	4	4	5	5	2	5	5	5	5	5	5	5	1	3	3	3	3	5	1	1	1	5	1	3	4	4	2	4	4	4	5	5	3	5	5	4	4	5	5	5
4	4	4	4	4	4	4	4	5	5	5	4	4	4	1	4	4	4	4	4	4	5	2	3	3	3	3	4	1	1	1	4	2	3	4	4	2	2	4	5	5	5	4	5	5	4	4	4	5	5
4	4	4	4	3	4	5	4	5	5	4	4	4	4	1	4	4	4	4	4	4	5	1	3	3	3	3	5	1	1	1	4	3	3	3	4	4	4	4	5	4	4	3	5	4	5	5	5	5	5
5	5	5	3	3	5	5	4	5	3	4	4	4	4	2	5	5	5	5	5	4	5	2	3	3	3	3	5	1	1	1	4	2	3	4	4	1	2	4	5	5	5	3	5	5	5	5	5	5	5
4	4	4	4	4	4	4	5	5	4	5	5	4	4	2	4	4	4	4	4	5	5	1	3	3	3	3	5	1	1	1	4	1	3	4	4	4	4	4	4	5	5	3	5	5	5	5	5	5	5
4	4	4	4	4	4	4	4	4	4	4	4	5	5	2	5	5	5	5	5	5	5	1	3	3	3	3	4	1	1	1	4	1	4	4	4	5	5	5	5	4	5	3	5	5	5	5	5	4	4
5	4	4	4	3	4	5	4	5	4	4	4	4	4	1	5	5	5	5	5	5	5	1	3	3	3	3	4	2	2	2	4	2	3	4	4	2	4	4	4	5	5	4	5	4	5	5	5	5	5
5	4	4	5	4	4	4	4	4	4	4	5	2	2	2	5	5	5	4	4	4	5	1	3	3	3	3	4	2	2	2	4	3	3	3	4	2	4	4	4	4	5	4	4	4	4	4	4	5	5
4	4	3	3	3	4	5	5	5	4	4	4	4	4	1	5	4	4	4	4	4	5	1	3	3	3	3	4	1	2	1	4	1	3	3	4	4	5	5	5	5	5	4	5	5	5	5	5	4	4
5	5	4	4	4	5	4	5	5	4	5	4	4	4	2	5	5	4	4	4	4	5	2	3	3	3	3	5	1	1	1	4	1	3	3	4	5	5	5	5	5	5	4	4	4	4	4	4	5	5
5	5	5	5	5	5	5	4	4	4	4	4	3	2	2	4	5	5	4	4	4	4	4	4	5	5	5	5	2	4	2	2	4	4	5	5	4	5	4	4	4	5	4	5	4	4	4	4	4	5
4	4	4	4	4	4	4	4	5	5	5	5	2	2	1	5	4	4	4	4	4	4	4	4	4	5	4	4	1	4	2	2	4	5	5	4	4	4	4	4	5	2	4	5	5	5	5	5	5	4
5	4	4	4	4	4	5	5	4	5	4	5	5	5	5	5	4	4	4	4	4	4	4	4	5	4	4	4	4	4	4	4	4	5	5	5	5	5	4	4	4	4	4	4	4	4	4	4	4	4
4	4	4	4	5	5	5	4	4	4	5	5	2	2	1	5	5	5	5	5	5	5	5	5	5	4	5	4	4	5	2	4	5	5	5	5	4	5	5	5	5	5	5	4	5	5	4	4	4	4
5	4	4	4	4	4	4	4	4	4	4	4	3	3	2	4	4	4	4	4	4	4	4	4	5	5	4	4	4	4	2	4	4	4	4	5	4	4	4	4	5	2	5	4	4	4	4	4	4	4
4	4	4	4	5	4	4	4	4	4	4	4	4	5	2	4	4	4	4	4	4	4	4	4	4	4	4	5	4	5	4	4	4	4	4	4	4	4	5	4	4	4	4	5	5	5	5	5	5	5
4	4	4	5	4	4	5	4	5	4	4	4	4	5	4	4	4	4	5	4	4	5	4	4	5	4	4	5	2	4	4	4	4	4	5	4	4	4	4	5	4	4	4	4	5	4	4	5	4	4
4	4	5	4	4	4	5	5	5	5	5	5	3	3	2	4	4	4	5	4	3	4	4	4	4	5	5	4	3	4	3	4	4	4	4	5	5	5	5	4	5	4	4	5	4	4	4	5	4	5
5	5	4	5	3	5	5	4	4	5	5	5	5	3	4	5	5	5	5	5	4	5	5	5	5	5	5	5	3	4	4	3	4	5	5	5	1	5	5	5	5	5	5	5	5	5	5	5	5	5
5	5	4	3	4	5	5	4	4	4	5	4	4	4	2	5	5	5	5	5	5	5	5	5	5	5	5	5	3	4	4	2	4	5	5	5	4	5	5	5	5	5	5	5	5	5	5	5	5	5
4	5	5	2	5	5	5	4	4	5	5	5	2	2	2	5	5	5	1	1	3	4	4	5	5	5	5	5	4	5	4	4	5	5	5	5	5	5	5	5	5	5	5	5	5	5	5	5	5	5
4	4	4	3	4	5	5	4	4	5	5	5	4	3	5	5	5	5	5	5	5	5	5	5	5	5	5	5	3	4	4	3	4	5	5	5	5	5	5	5	5	5	5	5	5	5	5	5	5	5
5	5	4	5	5	5	5	5	5	5	5	5	5	4	2	5	5	5	5	5	5	5	5	5	5	5	5	5	4	5	4	4	5	5	5	5	5	5	5	5	5	5	5	5	5	5	5	5	5	5
5	5	5	5	5	5	5	4	4	5	5	5	4	4	2	5	5	5	5	5	5	5	5	5	5	5	5	5	2	4	3	3	4	5	5	5	5	5	5	5	5	5	5	5	5	5	5	5	5	5
4	4	4	4	4	4	4	4	4	4	5	5	3	3	4	5	5	5	4	5	5	5	5	5	4	4	4	4	1	3	4	1	4	5	5	5	5	5	5	5	5	5	4	4	4	5	5	5	5	5
4	4	4	4	4	4	5	4	4	4	5	5	4	4	2	5	5	5	5	5	4	4	5	5	5	5	5	5	4	4	4	4	4	5	5	5	5	5	5	5	5	4	4	5	5	5	5	5	5	5
4	4	4	4	4	4	5	4	4	4	5	4	4	4	2	5	5	5	4	4	4	4	4	5	5	5	5	5	3	4	4	3	4	5	5	5	5	5	5	4	5	4	5	5	5	5	5	5	5	4
4	4	4	4	4	4	4	4	4	4	5	5	4	4	2	4	4	5	5	5	5	5	5	5	5	5	5	5	4	4	4	4	4	4	5	5	5	5	5	5	5	4	4	5	5	4	5	5	5	4
4	4	4	4	4	4	4	4	4	4	5	5	5	5	2	5	5	5	4	4	4	4	5	4	3	5	5	5	5	5	4	3	4	5	5	5	5	5	5	5	5	5	5	5	4	5	5	5	5	5
4	5	5	4	4	5	5	4	5	4	4	5	4	4	2	5	5	5	5	5	5	5	5	5	5	5	5	5	5	5	5	3	5	5	5	5	5	5	5	5	5	5	5	5	4	5	5	5	5	5
5	5	5	4	4	5	5	5	4	4	5	5	5	5	5	5	5	5	5	5	5	5	5	5	5	5	5	5	5	5	5	5	5	5	5	5	5	5	5	5	5	5	5	5	5	5	5	5	5	5
4	4	4	4	4	4	4	4	4	4	5	5	5	5	2	4	5	5	5	5	5	5	5	5	5	5	5	5	4	4	4	4	4	5	5	5	5	5	5	5	5	4	5	5	5	5	5	5	5	5
5	5	5	4	5	5	5	5	5	5	5	5	5	5	5	5	5	5	5	5	5	5	5	5	5	5	5	5	4	4	2	2	4	5	5	5	5	5	5	5	5	5	5	5	4	5	5	5	5	5
4	4	4	5	4	5	5	4	4	5	5	5	5	4	2	5	5	5	5	5	5	5	4	5	5	5	5	5	4	5	5	4	5	5	5	5	4	4	4	5	5	5	5	5	5	5	5	5	5	5
5	4	4	4	4	4	4	4	4	4	4	4	5	5	5	5	5	5	5	5	5	5	5	5	5	5	5	5	3	5	5	3	5	5	5	5	5	5	5	5	5	5	5	5	5	5	5	5	5	5
5	4	5	5	5	5	5	5	5	5	5	5	5	5	5	5	5	5	5	5	5	5	5	5	5	5	5	5	3	4	4	4	4	5	4	4	4	5	5	5	5	5	5	5	5	5	5	5	5	5
4	4	4	4	4	4	3	4	5	5	5	5	5	5	2	4	5	5	5	4	4	5	4	5	5	5	5	4	2	4	2	2	4	5	5	5	5	4	4	4	4	2	5	5	5	5	5	5	5	4
5	4	5	4	5	5	5	4	2	4	4	4	2	2	2	5	5	4	4	4	4	4	4	4	5	5	5	4	4	4	4	4	4	5	5	5	4	5	5	5	5	2	5	5	5	5	5	4	4	4
4	4	5	4	3	5	5	4	4	4	4	4	4	4	4	4	4	4	4	4	4	4	4	4	4	4	4	4	2	4	4	4	4	5	4	4	4	4	4	4	4	4	4	5	4	4	4	5	5	5
5	5	5	5	4	4	4	4	5	4	4	4	4	4	1	5	4	4	4	4	4	5	4	4	4	4	4	4	4	4	4	4	4	4	4	4	4	5	5	5	5	5	5	5	4	4	4	4	4	4
4	5	4	4	4	4	4	4	4	4	5	4	4	4	4	4	5	4	4	4	4	4	4	4	4	4	4	4	2	4	2	4	5	4	4	4	4	4	4	4	4	4	5	4	5	4	4	4	4	4
4	4	4	4	5	5	4	5	5	4	4	4	4	4	3	4	4	4	4	4	4	4	4	4	4	4	4	4	2	4	2	2	4	4	4	4	4	4	4	4	5	5	5	5	5	5	4	5	4	4
4	4	4	5	5	5	5	4	4	5	4	4	2	2	2	5	4	4	4	4	2	4	4	5	5	5	5	5	4	4	2	4	4	4	4	5	5	5	5	4	4	2	4	5	4	4	4	4	4	4
5	5	4	5	4	4	4	4	4	4	5	4	2	2	2	5	5	4	5	5	5	5	5	5	5	4	5	5	4	4	4	4	4	4	4	4	4	5	5	5	5	2	4	5	5	5	5	4	4	4
4	5	5	4	4	4	4	4	4	4	5	5	4	2	1	4	4	4	5	5	5	4	4	4	4	4	4	4	1	4	1	1	4	5	5	5	5	5	5	5	5	2	4	5	4	4	4	4	4	4
4	5	5	4	4	4	4	4	5	4	4	5	4	4	1	4	4	4	4	5	5	5	2	4	5	5	5	4	1	2	2	2	4	4	4	4	4	5	5	5	5	4	4	4	4	4	4	5	5	5
4	5	2	4	4	4	5	4	4	4	4	4	4	4	4	4	4	4	4	4	4	4	4	4	4	4	4	4	1	4	3	2	4	5	4	4	1	5	5	4	5	4	4	4	4	4	4	4	4	4
4	4	5	1	4	4	4	4	4	4	4	5	1	1	1	4	1	4	1	2	1	3	4	4	4	4	4	4	3	4	3	3	4	5	4	4	4	4	4	4	4	2	5	4	5	5	4	4	4	4
4	4	4	5	5	5	5	5	5	5	5	5	5	5	5	5	4	5	4	5	4	5	5	4	5	4	5	5	3	4	3	3	4	5	5	5	4	4	5	4	5	4	4	4	4	4	4	4	4	4
4	4	4	5	4	4	4	4	4	4	4	4	4	4	4	4	4	4	4	5	4	4	4	4	4	4	5	5	3	4	4	4	4	4	4	4	4	4	5	5	4	4	5	4	5	4	5	4	4	5
4	4	5	5	4	4	4	4	5	4	4	4	4	4	4	4	4	5	4	4	4	4	4	5	5	4	5	4	3	4	4	4	5	4	4	4	5	4	4	4	4	4	5	4	4	4	5	4	4	4
4	4	4	5	4	4	4	4	4	4	4	4	4	5	4	4	4	4	4	4	4	4	4	4	4	4	4	4	4	4	4	4	4	4	4	5	4	4	4	4	4	4	4	4	4	5	5	5	5	4
4	4	5	5	5	5	5	5	5	5	4	4	4	4	4	4	4	4	4	5	4	5	4	4	4	4	5	4	4	4	5	4	4	4	4	4	5	4	4	4	5	4	4	4	4	4	5	5	5	5
4	4	4	4	4	4	4	4	4	4	4	4	5	4	4	4	5	4	4	5	4	4	4	4	4	4	5	4	3	4	4	4	4	5	5	5	4	4	5	4	4	4	4	4	4	4	5	4	4	5
4	4	4	4	4	4	4	4	4	4	4	5	5	4	4	4	4	4	4	4	4	4	4	5	4	4	4	4	3	4	3	3	4	4	4	4	4	4	4	4	4	4	4	4	4	4	4	4	4	4
3	4	4	4	4	4	4	4	4	4	4	4	4	4	5	5	4	5	5	5	5	5	5	5	5	5	5	4	3	3	3	4	4	4	4	4	4	4	4	4	4	4	5	5	5	4	4	4	5	4
4	4	4	4	5	4	4	4	4	4	5	5	4	4	4	5	5	5	4	4	4	4	4	5	4	4	4	4	4	4	4	4	4	4	4	4	4	4	4	5	4	4	4	4	4	4	4	4	4	4
5	4	4	4	5	4	4	4	5	4	4	5	4	4	4	5	4	4	4	4	4	5	4	4	4	4	4	5	5	5	5	5	5	5	4	4	4	4	4	4	5	4	5	4	5	4	4	4	4	4
4	4	4	4	4	4	4	5	4	5	5	5	4	5	5	4	5	5	4	4	5	5	5	4	4	4	4	4	3	3	3	4	4	4	4	4	4	4	5	5	5	5	5	5	5	4	5	5	5	5
4	4	5	4	4	4	4	4	4	4	4	5	4	4	4	4	4	4	4	4	4	4	4	5	4	4	4	4	3	4	3	4	4	4	5	4	4	5	5	4	5	5	4	4	4	4	4	4	5	5
4	4	4	4	4	4	5	5	4	5	5	4	5	4	2	4	4	5	4	4	4	4	4	4	4	5	4	4	3	4	3	3	4	4	4	4	5	5	5	5	5	5	5	5	5	5	4	4	5	4
4	4	5	4	4	5	4	4	5	4	4	4	5	4	4	4	5	4	4	4	4	5	5	4	4	4	4	3	3	4	3	4	4	5	4	4	5	4	5	4	5	2	4	4	4	4	4	4	4	4
4	4	4	5	4	4	4	5	4	5	4	4	4	4	4	5	5	4	4	4	4	4	4	4	4	4	4	3	3	4	3	3	4	4	4	4	4	5	5	5	4	4	5	4	4	4	4	4	4	4
4	4	4	4	5	4	4	4	4	4	4	4	4	4	4	4	4	4	4	4	4	4	4	4	4	4	4	4	3	4	3	3	4	5	4	4	4	4	4	4	4	4	4	4	4	4	4	4	4	4
4	5	4	4	4	4	5	4	4	4	5	4	4	5	4	5	4	4	4	4	4	4	4	4	4	4	4	4	3	4	3	3	4	4	4	4	5	5	5	5	5	5	5	4	5	4	5	4	4	5
4	5	4	4	4	4	5	4	5	4	4	5	4	5	5	5	4	4	4	4	4	4	4	4	4	4	4	4	3	4	3	5	4	4	4	5	5	5	5	4	4	5	5	4	4	4	4	4	4	5
4	4	4	4	4	4	4	4	4	4	5	5	5	5	5	4	4	4	4	4	4	4	4	5	4	5	4	4	3	3	3	4	4	4	4	4	4	5	5	5	5	5	5	5	5	5	5	4	4	4
4	4	4	4	5	4	4	4	5	4	4	4	5	4	4	4	5	5	4	4	4	4	4	4	4	4	4	4	4	4	3	5	4	4	4	5	5	5	5	5	5	5	5	5	5	5	5	5	5	5
4	4	5	4	4	4	5	4	4	5	4	5	4	5	4	4	5	5	5	4	4	4	4	4	4	4	4	4	4	4	4	4	4	4	5	4	4	4	4	4	5	5	4	4	4	4	4	4	4	4
4	4	4	4	4	4	4	4	4	5	4	4	4	4	5	5	5	4	4	4	4	4	4	4	4	4	4	4	4	4	3	4	5	5	5	5	4	4	4	4	4	4	3	5	4	4	4	4	4	4
4	5	4	4	5	4	5	4	5	4	4	4	5	4	4	5	4	4	4	4	5	4	5	4	4	4	4	4	3	4	3	4	4	5	4	5	5	4	4	4	5	4	4	4	4	4	4	4	4	4
4	4	4	5	4	4	4	4	4	4	4	4	4	4	4	4	4	4	4	4	4	4	4	4	4	4	4	4	3	5	4	4	4	4	4	4	5	4	4	4	4	5	4	4	4	4	4	5	4	4
4	4	4	4	4	4	4	5	4	4	4	5	4	5	4	4	4	4	4	4	4	5	4	4	4	4	5	3	3	4	3	3	4	4	4	4	4	4	4	4	4	4	4	4	5	4	4	4	4	4
4	4	5	5	4	5	4	5	4	4	4	4	4	4	5	4	4	5	4	4	5	4	4	4	4	4	5	4	3	4	4	3	3	4	4	4	4	4	4	3	5	4	5	5	5	5	5	4	5	4
4	4	5	4	4	5	4	4	5	4	4	4	4	4	5	4	4	4	5	4	4	4	4	4	5	4	4	4	4	4	4	4	4	4	4	4	4	4	4	4	4	4	4	4	4	4	4	4	5	5
4	4	4	4	4	4	4	4	4	4	4	4	4	4	4	4	4	4	4	4	4	4	4	4	4	4	4	5	4	4	4	4	4	4	4	4	4	4	4	4	4	4	4	4	4	4	4	4	4	4
4	4	4	5	4	4	4	4	4	5	4	4	4	4	4	4	4	4	4	4	4	4	4	4	4	4	4	4	4	4	4	4	4	4	4	4	4	4	4	4	4	4	4	4	4	4	4	4	4	4
4	4	4	4	4	5	5	4	4	4	4	4	4	4	4	4	4	4	5	4	4	4	4	4	4	4	4	4	3	5	5	5	4	5	4	4	5	4	4	4	4	4	4	4	4	4	4	5	4	4
4	5	5	5	5	5	5	5	5	5	5	5	5	5	5	5	5	5	5	5	4	5	5	5	5	5	5	5	5	5	5	5	5	5	5	5	5	5	5	5	5	5	5	5	5	5	5	5	5	5
4	4	4	4	4	4	4	4	4	4	4	4	4	4	4	4	4	4	4	4	4	5	4	5	4	4	4	4	4	4	4	4	4	4	4	5	4	5	4	5	5	5	4	4	4	4	4	4	5	4
4	4	4	4	4	4	4	4	4	4	4	4	4	4	4	4	4	4	4	4	4	4	4	4	4	4	4	4	4	4	4	4	4	4	4	4	4	4	4	5	4	4	4	4	4	4	4	4	4	4
4	4	4	4	4	4	4	4	4	4	4	4	4	4	4	4	4	4	5	4	4	4	4	5	4	4	4	4	4	5	4	4	4	4	4	4	4	4	4	4	4	4	4	4	4	4	4	4	4	4
4	4	4	4	4	5	4	4	4	4	4	4	4	4	4	4	4	4	4	4	4	4	4	4	4	4	4	4	4	5	4	4	4	4	4	4	4	4	4	4	4	4	4	4	4	4	4	4	4	4
4	4	5	4	4	4	4	4	4	4	4	4	4	4	2	4	4	4	5	5	5	4	4	4	4	4	4	3	2	4	3	4	4	4	4	4	4	5	4	4	4	4	4	4	4	4	4	4	4	4
4	4	5	4	5	4	5	4	4	4	4	5	4	4	4	5	4	4	4	5	4	4	4	4	5	4	4	4	3	4	2	5	4	5	5	5	5	5	5	5	5	4	4	4	4	4	4	4	4	4
4	4	4	4	5	5	5	5	5	4	4	4	5	4	4	5	4	5	4	4	4	4	4	5	4	4	4	4	5	4	4	4	4	4	5	4	4	4	5	4	4	4	4	4	4	4	4	4	5	4
Legend: AT1 to AT14 represent the initial pool of items used for Attitude construct measurement, IS1 to IS8 represent the initial pool of items used for Intention construct measurement, KR1 to KR14 represent the initial pool of items used for Knowledge of Renewable Energy construct measurement, CE1 to CE14 represent the initial pool of items used for Environmental Concern construct measurement, S…
[truncated: 13 more columns]
