# Supplementary material for: The significance of incorporating spatial disparities in scale development for assessing latent constructs in the field of bioenergy
Source: Research Square preprint supplement (doi:10.21203/rs.3.rs-3360144/v1), 2023-10-11
Supplement: Supplementary file 1 [file e5a32216debad064c41dca25.docx]

**Table A.1:** List of the 63 initial items used for the study and their descriptive statistics (mean value and standard deviation of Likert scores)

| **Items code** | **Constructs** | **Items definition** | **Mean** | **SD** |
| --- | --- | --- | --- | --- |
| AT1 | Attitude | I believe that forestry residues supply for electricity generation will not jeopardize food security | 4.29 | 0.54 |
| AT2 | Forestry residues use for electricity will reduce fossil and traditional forms of energy use | 4.29 | 0.55 |
| AT3 | Increased use of forestry residues for producing electricity can mitigate the global warming problems | 4.26 | 0.55 |
| AT4 | Power generation using forestry residues for the global goal to mitigate environmental problems benefits me a lot | 4.18 | 0.61 |
| AT5 | Power generation using forestry residues will offer competitive benefits to my country | 4.05 | 0.66 |
| AT6 | Investment in power generation using forestry residues will create more jobs | 4.27 | 0.60 |
| AT7 | Using power from forestry residues will reduce the country dependence on foreign oil | 4.40 | 0.50 |
| AT8 | Power generation from forestry residues will help to meet our country’s energy demand | 4.25 | 0.56 |
| AT9 | Power generation from forestry residues will improve rural economy | 4.35 | 0.57 |
| AT10 | Power generation from forestry residues will have more benefits than risks for the society | 4.26 | 0.53 |
| AT11 | The use of power from forestry residues will prevent people from respiratory and other diseases | 4.56 | 0.51 |
| AT12 | Power generation from forestry residues will provide more safety to consumers compared to fossil and traditional energy | 4.35 | 0.52 |
| AT13 | I believe that clean energy like electricity from forestry residues can increase my business | 3.57 | 1.16 |
| AT14 | By using power from forestry residues. I believe I can improve my income | 3.45 | 1.19 |
| IS1 | Intention | I will supply my residues for power/gas generation however the energy price | 2.51 | 1.32 |
| IS2 | Energy crops and Energy plantations should be established for bioenergy production | 4.29 | 0.80 |
| IS3 | I plan to supply my share of residues for power generation rather than using it for heating | 4.38 | 0.70 |
| IS4 | I plan to supply my share of residues for power generation production rather than using it for building | 4.36 | 0.65 |
| IS5 | I believe I should use alternative materials for building rather than using wood residues | 3.94 | 1.11 |
| IS6 | I believe I can supply my share of residues to a power generation industry | 3.95 | 1.11 |
| IS7 | I am quite optimistic about the possibility to supply the residues for power generation as long time as it will be | 4.05 | 0.89 |
| IS8 | Rather than selling the residues. it is more useful to supply it for power/gases generation | 4.34 | 0.70 |
| KR1 | KRE | I have enough knowledge about RE that motivate me to supply the residues for clean energy | 3.43 | 1.22 |
| KR2 | Bioenergy is obtained from living organism | 3.96 | 0.75 |
| KR3 | Residues form agricultural and forests, solid municipality waste, algae are some of the biomass sources that can be converted into energy | 3.87 | 0.80 |
| KR4 | Biogas, biofuel, bioelectricity, briquettes, improved charcoal etc. are environmentally friendly bioenergy forms | 3.96 | 0.75 |
| KR5 | I know that the renew of renewable sources is influenced by the speed to which they are harvested and they are regenerated | 3.92 | 0.86 |
| KR6 | I am familiar with solar energy | 4.59 | 0.53 |
| KR7 | I am familiar with wind energy | 2.90 | 1.16 |
| KR8 | I am familiar with bioenergy | 3.49 | 1.14 |
| KR9 | I am familiar with geothermal energy | 2.94 | 1.13 |
| KR10 | I am familiar with hydroelectric energy | 3.70 | 0.81 |
| KR11 | I’m well knowledgeable about RE and especially bioenergy | 3.56 | 1.04 |
| KR12 | RE are energy forms that cannot run out contrary to fossil fuel | 4.16 | 0.65 |
| KR13 | RE are environmentally friendly forms of energy | 4.20 | 0.62 |
| KR14 | Biomass, solar, wind, water, geothermal are sources of RE | 4.31 | 0.48 |
| CE1 | EC | I believe that forestry residues supply for power generation will mitigate deforestation rate | 3.83 | 1.08 |
| CE2 | The use of forestry residues for power generation will decrease air pollution | 4.27 | 0.61 |
| CE3 | The use of forestry residues for power generation will reduce carbon footprint | 4.28 | 0.55 |
| CE4 | Forestry residues use for power generation should not affect the environment | 4.40 | 0.54 |
| CE5 | Agricultural practices using organic fertilizers should be prefered to the ones using chemical fertilizers | 4.64 | 0.53 |
| CE6 | Uncontrolled and selective logging should be combated | 4.48 | 0.71 |
| CE7 | Environment preservation is necessary for a sustainable development | 4.22 | 0.65 |
| CE8 | Preserving air. soil and water quality is necessary for human and animal health | 4.71 | 0.46 |
| CE9 | Land use for agriculture, building, industry, nature conservation should be environmentally friendly | 4.58 | 0.49 |
| CE10 | Municipality solid waste and sewage should be collected and treated | 4.56 | 0.51 |
| CE11 | Education and extension programs should integrate Water Sanitation and Hygiene | 4.59 | 0.49 |
| CE12 | Dustbins should be set everywhere in the municipality and at households’ level for solid wastes collection | 4.64 | 0.48 |
| CE13 | High carbon sequestration trees should be planted for green gases mitigation | 4.43 | 0.54 |
| CE14 | RE should necessary be developed to counterbalance the huge emission of green gases | 4.40 | 0.55 |
| SN1 | SN | I will supply my share of residues for clean energy production even my friends do not advise me | 3.66 | 1.17 |
| SN2 | The use of residues for energy production. publicly perceived as a good thing motivates me to f share for energy needs | 4.43 | 0.66 |
| SN3 | The public belief that biomass-based energy development will negatively affect the environment does not prevent me from supplying my share | 4.39 | 0.52 |
| SN4 | The public belief that RE are more expensive than the traditional energy does not prevent me from supplying my share | 4.34 | 0.60 |
| SN5 | Most people who are important to me would think that supplying the residues for energy production is respectful of the environment | 4.43 | 0.70 |
| PC1 | PBC | Biomass residues mobilization for clean energy production is entirely within my control | 3.51 | 1.09 |
| PC2 | If I accepted to supply my share people who are important to me would approve | 3.63 | 0.82 |
| PC3 | I generally do what most of people think it is profitable for the society | 4.53 | 0.53 |
| PC4 | I plan to motivate others people to supply their share of produced or consumed residues for energy production | 3.81 | 0.93 |
| PC5 | I would like to integrate a village-level cooperative body/ society that shall be involved in regulating the supply of residues to the energy producers | 3.77 | 1.01 |
| PC6 | I can motivate others respondents in my area to supply their share of residues for energy production | 3.81 | 1.00 |
| PC7 | I would like to support any organisation that can regulate residues supply market for energy production | 3.83 | 1.00 |
| PC8 | I’m willing to support local projects involving in power generation using renewable resources | 3.88 | 1.00 |

Legend: KRE=Knowledge of Renewable Energy, EC=Environmental Concern, PBC= Perceived Behavioral Control, SN=Subjective Norms, RE=Renewable Energy, SD=Standard Deviation.
